# Supplementary material for: Abnormalities of Dorsolateral Prefrontal Function in Women With Premenstrual Dysphoric Disorder: A Multimodal Neuroimaging Study
Source: Atypon-hosted journal article supplement (doi:10.1176/appi.ajp.2012.12030385), 2013-01-30
Supplement: 305_ds001.pdf [file 305_ds001.pdf]

## Supplemental Material

| <b>Supplemental Table 1</b>                                                                |                                       |                 |     |     |              |          |                             |
|--------------------------------------------------------------------------------------------|---------------------------------------|-----------------|-----|-----|--------------|----------|-----------------------------|
| Regions showing increased activation for Patients compared with Controls in 2-back>0-back. |                                       |                 |     |     |              |          |                             |
| P<0.05 false-discovery-rate-corrected (FDRcorr), extent threshold=50 voxels                |                                       |                 |     |     |              |          |                             |
|                                                                                            | Brain Region                          | MNI Coordinates |     |     | cluster size | T values | P <sub>FDRcorr</sub> values |
|                                                                                            |                                       | x               | y   | z   |              |          |                             |
| <b>PET</b>                                                                                 |                                       |                 |     |     |              |          |                             |
| <u>Controls&gt;Patients</u>                                                                |                                       |                 |     |     |              |          |                             |
|                                                                                            | NO SIGNIFICANT CLUSTERS               |                 |     |     |              |          |                             |
| <u>Patients&gt;Controls</u>                                                                |                                       |                 |     |     |              |          |                             |
|                                                                                            | Left Cerebellum                       | -48             | -70 | -38 | 7757         | 7.19     | 0.00001                     |
|                                                                                            | Left Inferior Frontal Gyrus (BA45)    | -46             | 16  | 24  | 2361         | 7.05     | 0.00001                     |
|                                                                                            | Right Middle Frontal Gyrus (BA9)      | 52              | 24  | 38  | 2844         | 6.99     | 0.00001                     |
|                                                                                            | Left Superior Temporal Gyrus (BA22)   | -60             | -52 | 18  | 170          | 5.55     | 0.00004                     |
|                                                                                            | Right Medial Frontal Gyrus (BA8)      | 8               | 34  | 42  | 498          | 5.09     | 0.0001                      |
|                                                                                            | Right Inferior Parietal Lobule (BA40) | 54              | -50 | 34  | 611          | 4.98     | 0.0001                      |
|                                                                                            | Left Precuneus (BA7)                  | -2              | -50 | 50  | 56           | 4.79     | 0.0002                      |
|                                                                                            | Left Middle Frontal Gyrus (BA8)       | -34             | 14  | 54  | 256          | 4.17     | 0.001                       |
|                                                                                            | Left Precuneus (BA7)                  | -2              | -72 | 50  | 121          | 3.90     | 0.002                       |
| <b>fMRI</b>                                                                                |                                       |                 |     |     |              |          |                             |
| <u>Controls &gt; Patients</u>                                                              |                                       |                 |     |     |              |          |                             |
|                                                                                            | Right Cuneus (BA19)                   | 26              | -86 | 30  | 158          | 6.96     | 0.0001                      |
|                                                                                            | Supramarginal Gyrus (BA40)            | -50             | -40 | 24  | 279          | 6.46     | 0.0002                      |
|                                                                                            | Left Precuneus (BA7)                  | -16             | -80 | 48  | 68           | 5.60     | 0.0007                      |
|                                                                                            | Right Precentral Gyrus (BA6)          | 32              | -18 | 68  | 67           | 5.58     | 0.0007                      |
|                                                                                            | Left Cuneus (BA19)                    | -24             | -90 | 20  | 92           | 5.57     | 0.0007                      |
|                                                                                            | Left Middle Temporal Gyrus (BA39)     | -30             | -68 | 26  | 68           | 4.37     | 0.007                       |
| <u>Patients &gt; Controls</u>                                                              |                                       |                 |     |     |              |          |                             |
|                                                                                            | Left Superior Frontal Gyrus (BA8)     | -2              | 20  | 56  | 18111        | 16.93    | <0.00001                    |
|                                                                                            | Left Inferior Parietal Lobule (BA40)  | -36             | -48 | 46  | 6780         | 12.98    | <0.00001                    |
|                                                                                            | Left Middle Occipital Gyrus (BA19)    | -44             | -84 | 10  | 1210         | 6.77     | <0.00001                    |
|                                                                                            | Left Inferior Parietal Lobule (BA40)  | -62             | -28 | 34  | 150          | 5.49     | 0.00001                     |
|                                                                                            | Right Cerebellum                      | 32              | -68 | -32 | 573          | 5.29     | 0.00002                     |
|                                                                                            | Left Cerebellum                       | -36             | -74 | -26 | 381          | 3.93     | 0.0008                      |
|                                                                                            | Left Precentral Gyrus(BA4)            | -36             | -8  | 52  | 66           | 3.15     | 0.006                       |
|                                                                                            | Right Middle Occipital Gyrus(BA19)    | 42              | -58 | -10 | 101          | 3.09     | 0.007                       |

\*Brain areas outside the frontal lobe were not hypothesized a priori.

| <b>Supplemental Table 2</b>                                                                                                                           |                 |     |     |              |          |                             |
|-------------------------------------------------------------------------------------------------------------------------------------------------------|-----------------|-----|-----|--------------|----------|-----------------------------|
| Regions showing a correlation between brain activation and GAF scores.<br>P<0.05 false-discovery-rate-corrected (FDRcorr), extent threshold=50 voxels |                 |     |     |              |          |                             |
| Brain Region                                                                                                                                          | MNI Coordinates |     |     | cluster size | T values | P <sub>FDRcorr</sub> values |
|                                                                                                                                                       | x               | y   | z   |              |          |                             |
| <b>PET</b>                                                                                                                                            |                 |     |     |              |          |                             |
| <u>Positive Correlation</u>                                                                                                                           |                 |     |     |              |          |                             |
| NO SIGNIFICANT CLUSTERS                                                                                                                               |                 |     |     |              |          |                             |
| <u>Negative Correlation</u>                                                                                                                           |                 |     |     |              |          |                             |
| * Left Middle Frontal Gyrus (BA8)                                                                                                                     | -36             | 12  | 54  | 226          | 7.78     | 0.0002                      |
| * Right Inferior Frontal Gyrus (BA10)                                                                                                                 | 38              | 52  | 4   | 594          | 7.33     | 0.0002                      |
| * Left Inferior Frontal Gyrus (BA46)                                                                                                                  | -38             | 48  | 10  | 785          | 6.35     | 0.002                       |
| * Right Middle Frontal Gyrus (BA8)                                                                                                                    | 48              | 16  | 52  | 303          | 5.16     | 0.001                       |
| * Right Cerebellum                                                                                                                                    | 8               | -82 | -30 | 591          | 4.93     | 0.002                       |
| * Right Superior Parietal Lobule (BA7)                                                                                                                | 36              | -48 | 50  | 120          | 4.35     | 0.004                       |
| * Right Cerebellum                                                                                                                                    | 32              | -60 | -28 | 75           | 4.35     | 0.004                       |
| * Left Cerebellum                                                                                                                                     | -40             | -70 | -20 | 159          | 4.34     | 0.003                       |
| Left Inferior Temporal Gyrus (BA37)                                                                                                                   | -56             | -62 | -8  | 54           | 4.05     | 0.006                       |
| Right Cerebellum                                                                                                                                      | 60              | -52 | -34 | 172          | 4.02     | 0.006                       |
| <b>fMRI</b>                                                                                                                                           |                 |     |     |              |          |                             |
| <u>Positive Correlation</u>                                                                                                                           |                 |     |     |              |          |                             |
| Left Superior Temporal Gyrus (BA22)                                                                                                                   | -44             | -54 | 16  | 74           | 8.21     | 0.00001                     |
| Right Middle frontal Gyrus (BA10)                                                                                                                     | 24              | 44  | 24  | 61           | 7.24     | 0.00005                     |
| <u>Negative Correlation</u>                                                                                                                           |                 |     |     |              |          |                             |
| * Right Middle Frontal Gyrus (BA9)                                                                                                                    | 42              | 14  | 32  | 2730         | 10.20    | <0.00001                    |
| * Left Superior Frontal Gyrus (BA8)                                                                                                                   | -6              | 16  | 56  | 3168         | 9.16     | <0.00001                    |
| * Left Middle Frontal Gyrus (BA9/46)                                                                                                                  | -38             | 38  | 32  | 2014         | 9.10     | <0.00001                    |
| * Left Superior Parietal Lobule (BA7)                                                                                                                 | -36             | -64 | 58  | 1122         | 8.52     | <0.00001                    |
| * Left Middle Occipital Gyrus (BA19)                                                                                                                  | -40             | -84 | 14  | 709          | 8.23     | <0.00001                    |
| * Right Superior Parietal Lobule (BA7)                                                                                                                | 40              | -54 | 52  | 1350         | 7.35     | 0.00001                     |
| Left Inferior Frontal Gyrus (BA47)                                                                                                                    | -36             | 24  | 2   | 1349         | 6.58     | 0.00002                     |
| Right Middle Temporal Gyrus (BA19)                                                                                                                    | 42              | -80 | 16  | 63           | 5.69     | 0.00008                     |
| * Right Cerebellum                                                                                                                                    | 34              | -76 | -24 | 90           | 4.67     | 0.0005                      |
| * Right Precuneus (BA7)                                                                                                                               | 18              | -64 | 64  | 57           | 4.43     | 0.001                       |
| * Right Putamen                                                                                                                                       | 16              | 8   | 6   | 228          | 3.55     | 0.006                       |

\* Indicates where clusters in GAF Negative Correlation and Activation overlapped within 5mm sphere (Within Modality)

Supplemental Figure 1

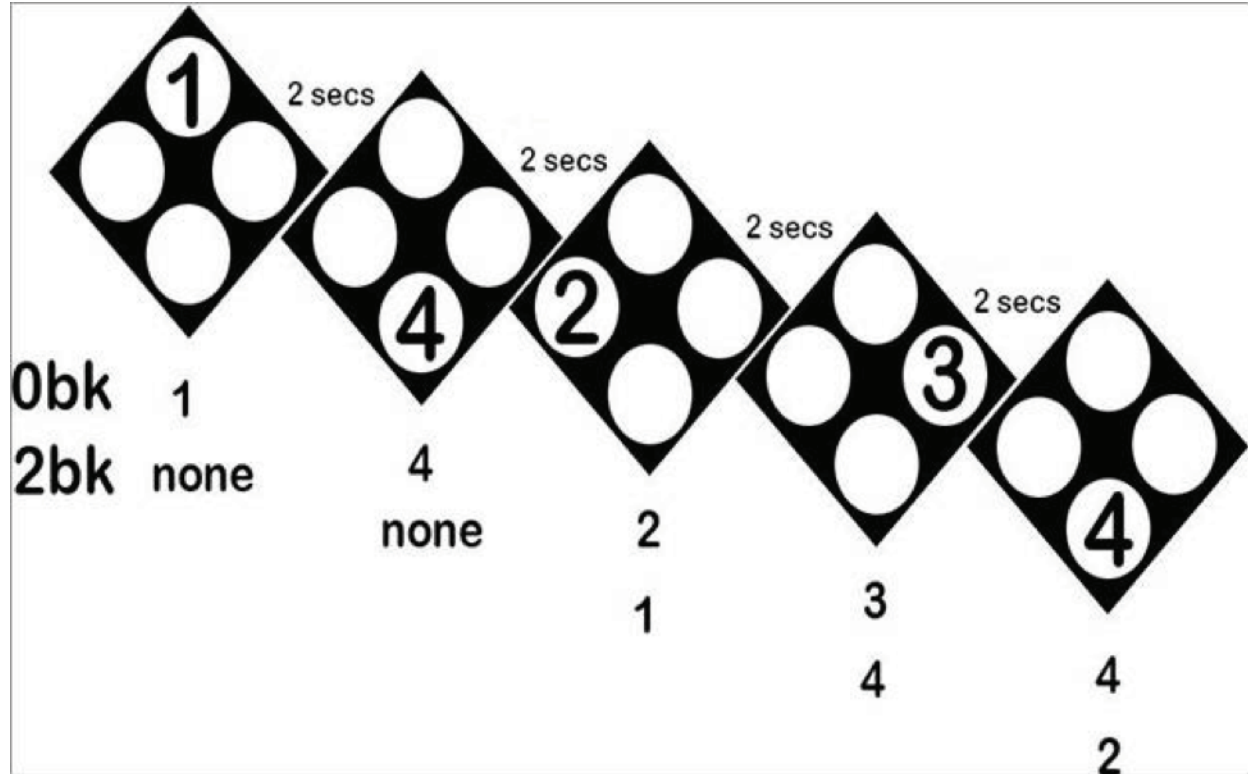

For the N-back task, the numbers 1–4 were presented on a computer monitor at set locations at the points of a diamond-shape and were shown in random order, one every two seconds. Subjects indicated a response at each trial by pressing one of four buttons arrayed on a response box in the same configuration as the stimuli on the screen. During the 0-back sensorimotor control task, participants pressed the button corresponding to the number shown at the time of the current trial, whereas during the 2-back working-memory task, they were instructed to press the button corresponding to the number shown two trials previously. There is no recognition involved, and working memory is emphasized.
